# Supplementary material for: Familiar face + novel face = familiar face? Representational bias in the perception of morphed faces in chimpanzees
Source: PubMed Central journal article supplement (PMC4991860; doi:10.7717/peerj.2304), 2016-08-04
Supplement: peerj-04-2304-s001.pdf [file peerj-04-2304-s001.pdf]

## Supplementary information

Title:

**Familiar face + novel face = familiar face? Morphed face recognition in chimpanzees**

Yoshi-Taka Matsuda\*, Masako Myowa-Yamakoshi, and Satoshi Hirata\*

\*To whom correspondence should be addressed.

E-mail: matsuda@brain.riken.jp, hirata.satoshi.8z@kyoto-u.ac.jp

This file includes:

- 1. Supplementary Materials**
- 2. Eye-tracking data (for Figures 1 and 2 in the main text)**
- 3. Cumulative histogram of fixation duration (Figure S1)**

## 1. Supplementary Materials and Methods

### *Subjects*

| Table S1. Relative dominance (chimpanzee # is dominant/subordinate/equal over familiar face #; M and F denote male and female, respectively) |                     |                     |                     |
|----------------------------------------------------------------------------------------------------------------------------------------------|---------------------|---------------------|---------------------|
|                                                                                                                                              | familiar face 1 (M) | familiar face 2 (M) | familiar face 3 (F) |
| chimpanzee1 (F)                                                                                                                              | subordinate         | subordinate         | (mother)            |
| chimpanzee 2 (F)                                                                                                                             | subordinate         | subordinate         | subordinate         |
| chimpanzee 3 (M)                                                                                                                             | (self)              | dominant            | dominant            |
| chimpanzee 4 (F)                                                                                                                             | subordinate         | subordinate         | (self)              |
| chimpanzee 5 (F)                                                                                                                             | subordinate         | subordinate         | equal               |
| chimpanzee 6 (F)                                                                                                                             | subordinate         | subordinate         | subordinate         |
| chimpanzee 7 (F)                                                                                                                             | subordinate         | subordinate         | dominant            |
| chimpanzee 8 (M)                                                                                                                             | subordinate         | (self)              | dominant            |

| Table S2. Kinship structure (familiar face # is father/mother/self/non-kin of chimpanzee #) |                     |                     |                     |
|---------------------------------------------------------------------------------------------|---------------------|---------------------|---------------------|
|                                                                                             | familiar face 1 (M) | familiar face 2 (M) | familiar face 3 (F) |
| chimpanzee 1 (F)                                                                            | father              | non-kin             | mother              |
| chimpanzee 2 (F)                                                                            | father              | non-kin             | non-kin             |
| chimpanzee 3 (M)                                                                            | self                | non-kin             | non-kin             |
| chimpanzee 4 (F)                                                                            | non-kin             | non-kin             | self                |
| chimpanzee 5 (F)                                                                            | non-kin             | non-kin             | non-kin             |
| chimpanzee 6 (F)                                                                            | father              | non-kin             | non-kin             |
| chimpanzee 7 (F)                                                                            | non-kin             | non-kin             | non-kin             |
| chimpanzee 8 (M)                                                                            | non-kin             | self                | non-kin             |

## 2. Eye-tracking data

### For Figure 1. Visual preference

Figure (b)

| Fixation duration (%) |               |                   |            |
|-----------------------|---------------|-------------------|------------|
|                       | familiar face | intermediate face | novel face |
| chimpanzee 1          | 22.975        | 35.526            | 41.498     |
| chimpanzee 2          | 38.845        | 25.450            | 35.705     |
| chimpanzee 3          | 32.691        | 19.791            | 47.518     |
| chimpanzee 4          | 40.385        | 22.332            | 37.283     |
| chimpanzee 5          | 11.399        | 32.149            | 56.453     |
| chimpanzee 6          | 40.334        | 28.532            | 31.134     |
| chimpanzee 7          | 30.320        | 26.420            | 43.260     |
| chimpanzee 8          | 28.919        | 31.186            | 39.895     |

Figure (c)

| Fixation count (%) |               |                   |            |
|--------------------|---------------|-------------------|------------|
|                    | familiar face | intermediate face | novel face |
| chimpanzee 1       | 26.087        | 32.609            | 41.304     |
| chimpanzee 2       | 38.889        | 27.778            | 33.333     |
| chimpanzee 3       | 38.235        | 17.647            | 44.118     |
| chimpanzee 4       | 25.000        | 25.000            | 50.000     |
| chimpanzee 5       | 17.857        | 35.714            | 46.429     |
| chimpanzee 6       | 29.268        | 39.024            | 31.707     |
| chimpanzee 7       | 28.889        | 28.889            | 42.222     |
| chimpanzee 8       | 24.000        | 28.000            | 48.000     |

Figure (d)

| Saccade length (%) |               |                   |            |
|--------------------|---------------|-------------------|------------|
|                    | familiar face | intermediate face | novel face |
| chimpanzee 1       | 22.391        | 31.687            | 45.922     |
| chimpanzee 2       | 40.095        | 19.719            | 40.186     |
| chimpanzee 3       | 36.287        | 16.535            | 47.178     |
| chimpanzee 4       | 35.547        | 24.453            | 40.001     |
| chimpanzee 5       | 13.570        | 34.482            | 51.949     |
| chimpanzee 6       | 31.182        | 36.490            | 32.328     |
| chimpanzee 7       | 27.147        | 26.538            | 46.315     |
| chimpanzee 8       | 24.356        | 32.030            | 43.615     |

**For Figure 2. Visual preference**

Figure (a)

| Fixation duration (%) |            |                       |
|-----------------------|------------|-----------------------|
|                       | 100% novel | 50% novel + 50% novel |
| chimpanzee 1          | 50.103     | 49.897                |
| chimpanzee 2          | 48.299     | 51.701                |
| chimpanzee 3          | 66.886     | 33.114                |
| chimpanzee 4          | 0          | 100                   |
| chimpanzee 5          | 49.475     | 50.525                |
| chimpanzee 6          | 67.913     | 32.087                |
| chimpanzee 7          | 63.206     | 36.794                |
| chimpanzee 8          | 68.917     | 31.083                |

Figure (b)

| Fixation count (%) |            |                       |
|--------------------|------------|-----------------------|
|                    | 100% novel | 50% novel + 50% novel |
| chimpanzee 1       | 52.941     | 47.059                |
| chimpanzee 2       | 42.857     | 57.143                |
| chimpanzee 3       | 71.429     | 28.571                |
| chimpanzee 4       | 0          | 100                   |
| chimpanzee 5       | 69.231     | 30.769                |
| chimpanzee 6       | 61.111     | 38.889                |
| chimpanzee 7       | 63.636     | 36.364                |
| chimpanzee 8       | 33.333     | 66.667                |

Figure (c)

| Saccade length (%) |            |                       |
|--------------------|------------|-----------------------|
|                    | 100% novel | 50% novel + 50% novel |
| chimpanzee 1       | 54.103     | 45.897                |
| chimpanzee 2       | 57.072     | 42.928                |
| chimpanzee 3       | 64.132     | 35.868                |
| chimpanzee 4       | 0          | 100                   |
| chimpanzee 5       | 42.672     | 57.328                |
| chimpanzee 6       | 38.707     | 61.293                |
| chimpanzee 7       | 49.272     | 50.728                |
| chimpanzee 8       | 62.116     | 37.884                |

### 3. Cumulative histogram of fixation duration

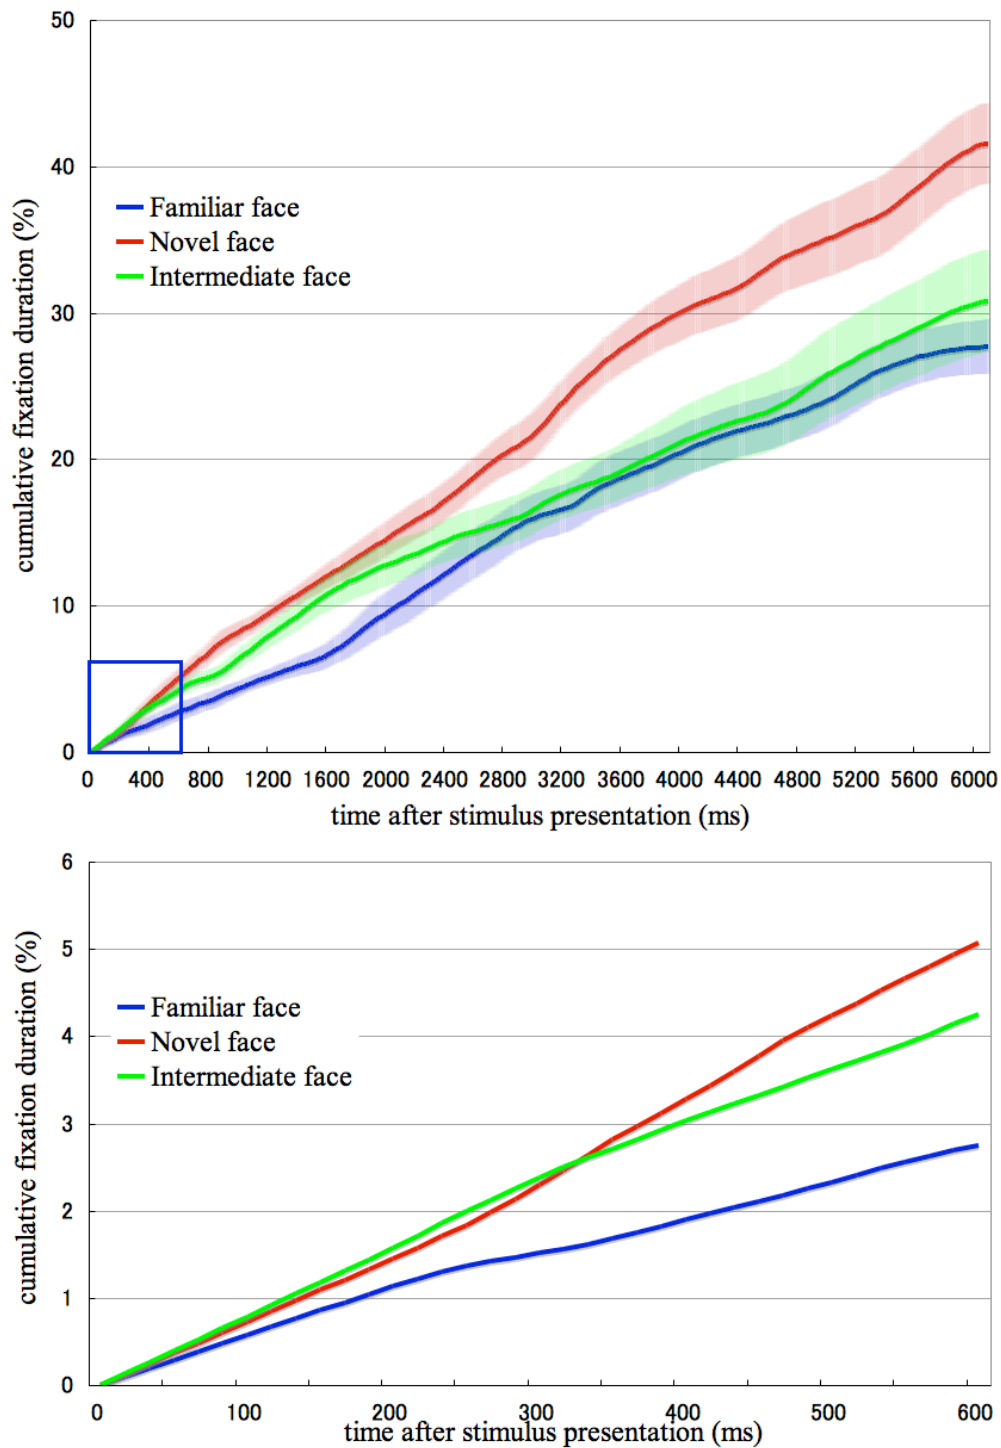

**Figure S1. Cumulative histogram of fixation duration after stimulus presentation.**  
Upper panel: The figure depicts the cumulative fixation duration ( $N = 8$ , average) when

looking at familiar (blue line), novel (red line) and intermediate (green line) faces after stimulus presentation. Cumulative fixation durations were normalised at the end of stimulus presentation (6,000 ms) for each subject to calculate proportions among three types of facial stimuli. Solid lines depict mean; pale zones depict SEM. Lower panel: the figure depicts higher resolution of the inset (initial 600 ms; blue rectangle) in the upper panel.
